# Supplementary material for: Prevalence and Risk Factors of Cerebral Small Vessel Disease in a Chinese Population-Based Sample
Source: PubMed Central journal article supplement — J Stroke. 2018 May 31;20(2):239–46. doi: 10.5853/jos.2017.02110 (PMC6007292; doi:10.5853/jos.2017.02110), 2018-05-31
Supplement: jos-2017-02110-suppl1.pdf [file jos-2017-02110-suppl1.pdf]

**Supplementary Table 1.** Prevalence of lacunes in each age strata in Shunyi Study and 3C-Dijon Study

| Age range (yr) | Shunyi Study   |                           | 3C-Dijon Study |                           |
|----------------|----------------|---------------------------|----------------|---------------------------|
|                | No. of persons | Prevalence of lacunes (%) | No. of persons | Prevalence of lacunes (%) |
| 35–39          | 38             | 5.3                       | -              | -                         |
| 40–44          | 115            | 5.2                       | -              | -                         |
| 45–49          | 184            | 4.3                       | -              | -                         |
| 50–54          | 249            | 8.0                       | -              | -                         |
| 55–59          | 211            | 9.5                       | -              | -                         |
| 60–64          | 194            | 23.7                      | -              | -                         |
| 65–69          | 115            | 27                        | 573            | 4.8                       |
| 70–74          | 74             | 41.9                      | 644            | 6.8                       |
| 75–79          | 27             | 37                        | 530            | 9.7                       |
| ≥80            | 4              | 50                        | 76             | 17.3                      |
| Total          | 1,211          | 14.5                      | 1,823          | 7.4                       |
