# Supplementary material for: Prevalence and Risk Factors of Cerebral Small Vessel Disease in a Chinese Population-Based Sample
Source: PubMed Central journal article supplement — J Stroke. 2018 May 31;20(2):239–46. doi: 10.5853/jos.2017.02110 (PMC6007292; doi:10.5853/jos.2017.02110), 2018-05-31
Supplement: jos-2017-02110-suppl2.pdf [file jos-2017-02110-suppl2.pdf]

**Supplementary Table 2.** Prevalence of CMBs in each age strata in Shunyi Study and Rotterdam Scan Study

| Age range (yr) | Shunyi Study   |                        | Rotterdam Scan Study |                        |
|----------------|----------------|------------------------|----------------------|------------------------|
|                | No. of persons | Prevalence of CMBs (%) | No. of persons       | Prevalence of CMBs (%) |
| 35–44          | 153            | 1.3                    | -                    | -                      |
| 45–49          | 184            | 4.3                    | 413                  | 6.5                    |
| 50–59          | 460            | 7.6                    | 1,696                | 11.5                   |
| 60–69          | 309            | 18.4                   | 1,350                | 16.8                   |
| 70–79          | 101            | 24.8                   | 377                  | 28.9                   |
| ≥80            | 4              | 25                     | 143                  | 35.7                   |
| Total          | 1,211          | 10.6                   | 3,979                | 15.3                   |

CMB, cerebral microbleed.
